# Supplementary material for: Mechanochemical Treatment in High-Shear Thermokinetic Mixer as an Alternative for Tire Recycling
Source: Polymers (Basel). 2022 Oct 19;14(20):4419. doi: 10.3390/polym14204419 (PMC9610282; doi:10.3390/polym14204419)
Supplement: Supplementary file 1 [file polymers-14-04419-s001.zip › polymers-1981177-supplementary.pdf]

## Supplementary files for:

# Mechanochemical Treatment in High-Shear Thermokinetic Mixer as an Alternative for Tire Recycling

Otávio Bianchi \*, Patrícia Bereta Pereira and Carlos Arthurs Ferreira

LAPOL/PPGE3M/Universidade Federal do Rio Grande do Sul, Av. Bento Gonçalves 9500,  
Porto Alegre 90010-150, Brazil

\* Correspondences: otavio.bianchi@gmail.com

This supplementary file shows the results of the EDX analysis, which was used to identify the main elements present in the GTR sample qualitatively.

EDS Layered Image 1

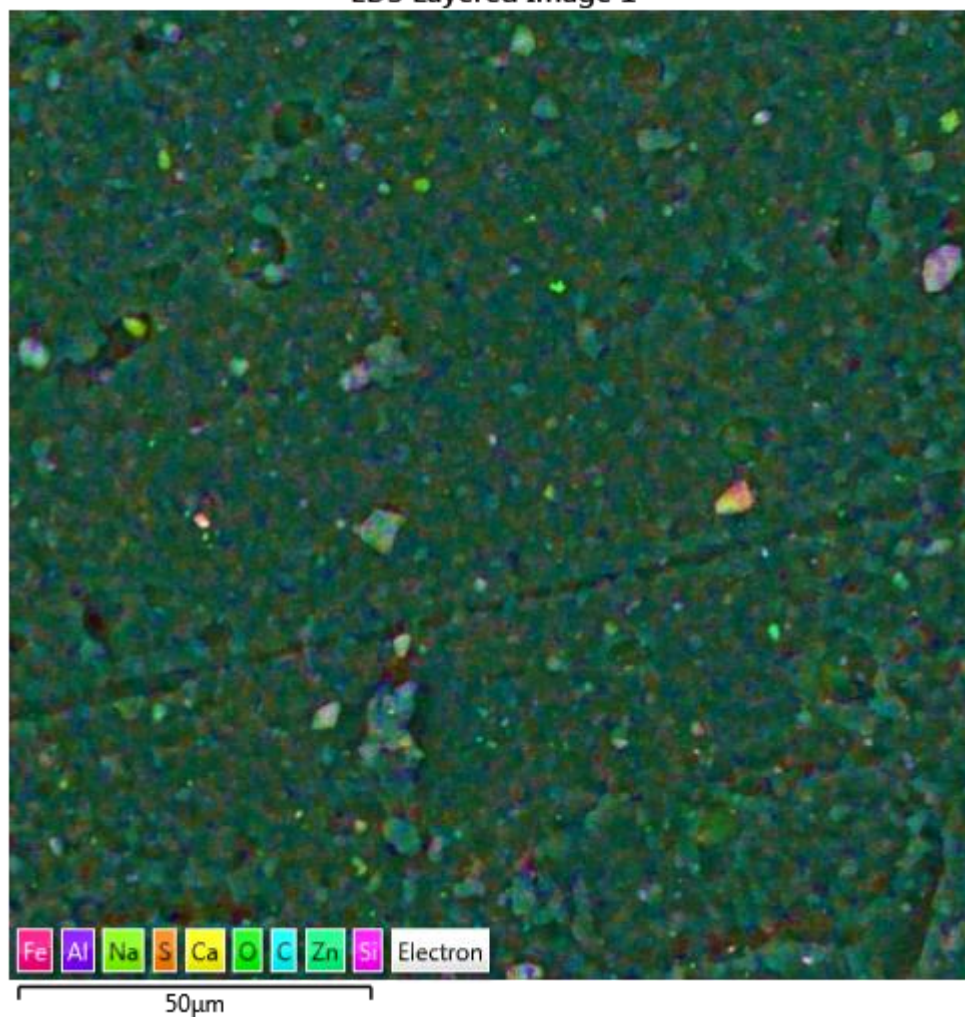

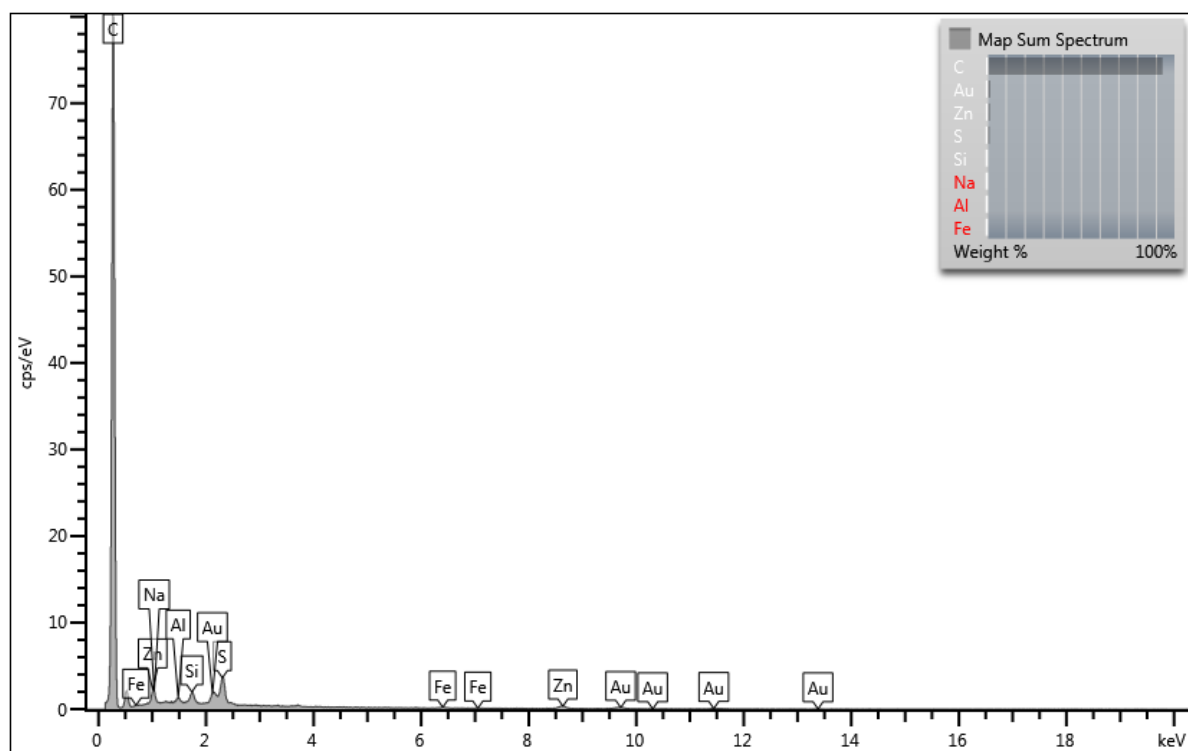

**Figure S1.** EDS analysis for GTR sample.

Electron Image 1

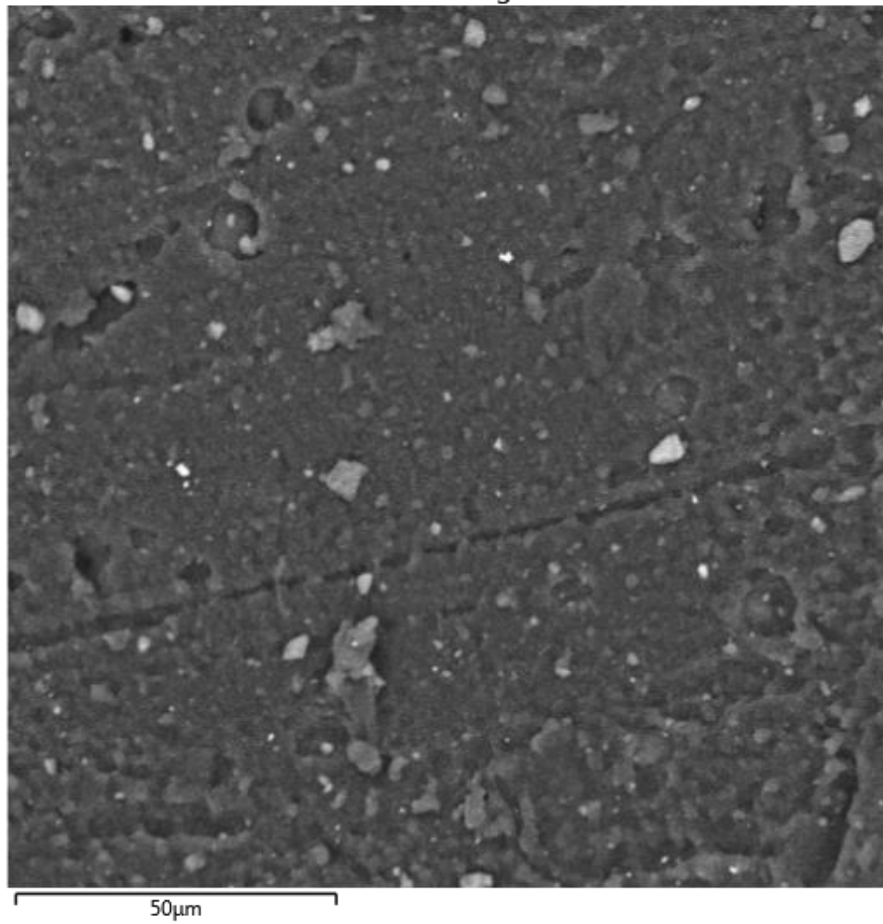

C K $\alpha$ 1\_2

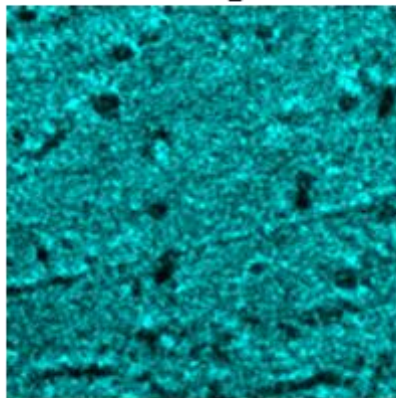

50 $\mu$ m

Si K $\alpha$ 1

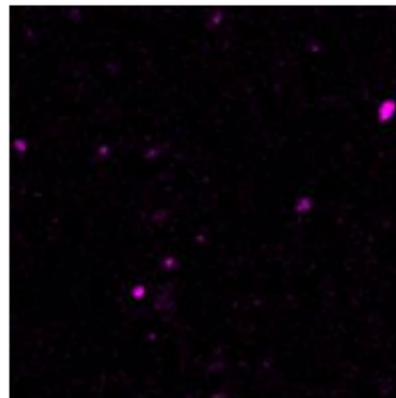

50 $\mu$ m

O K $\alpha$ 1

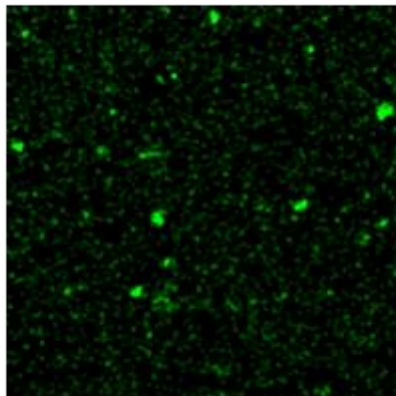

50 $\mu$ m

Na K $\alpha$ 1\_2

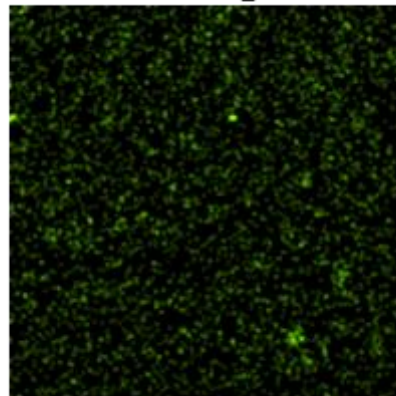

50 $\mu$ m

Al K $\alpha$ 1

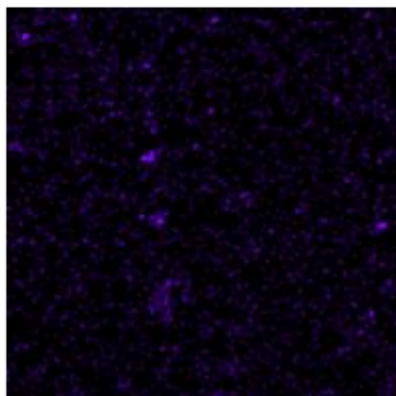

50 $\mu$ m

S K $\alpha$ 1

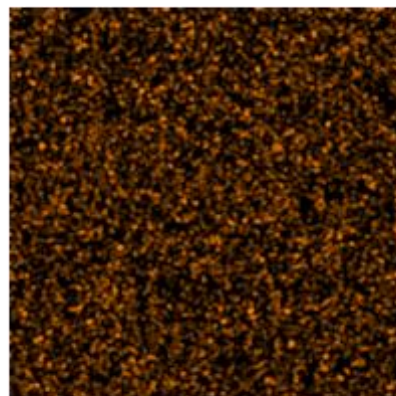

50 $\mu$ m

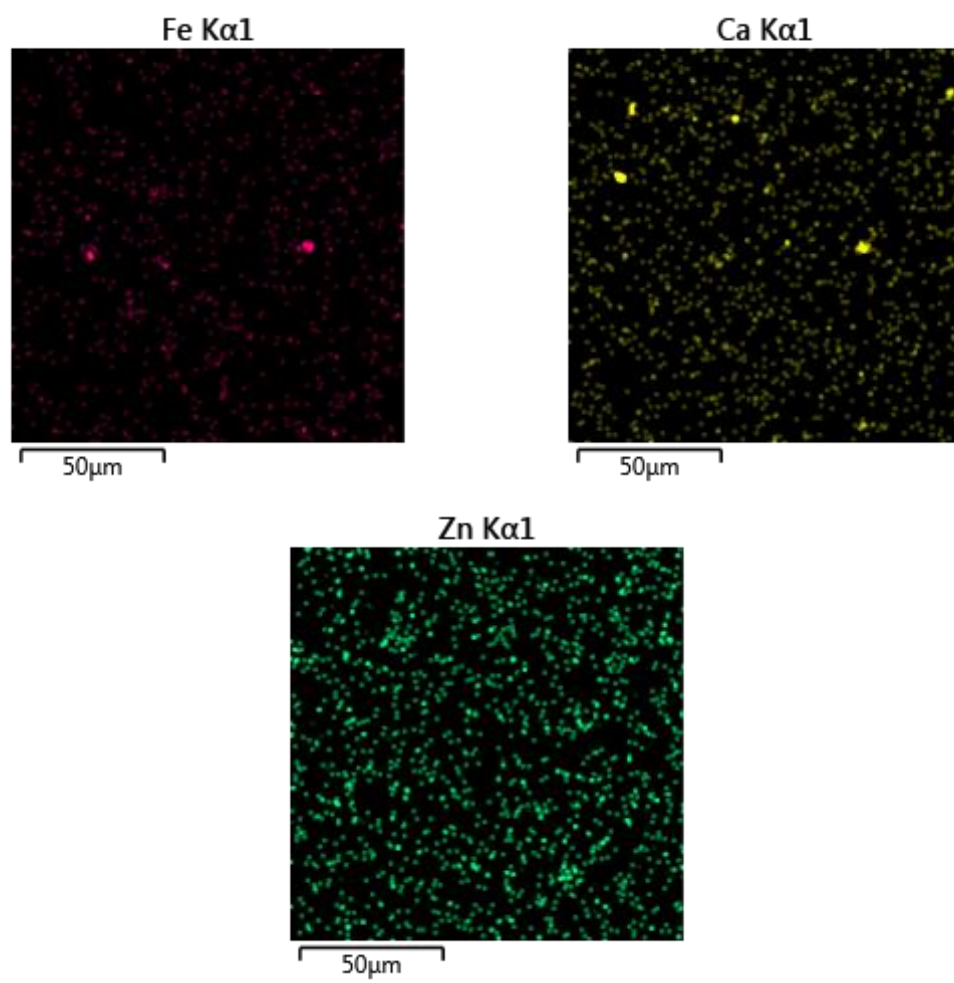

**Figure S2.** Compositional map for GTR sample.
